# Supplementary material for: Sustained-Release Powders Based on Polymer Particles for Pulmonary Delivery of Beclomethasone Dipropionate in the Treatment of Lung Inflammation
Source: MDPI journal article supplement (doi:10.3390/pharmaceutics15041248), 2023-04-14
Supplement: s1 [file s1]

# Supplementary materials: Sustained-release powders based on polymer particles for pulmonary delivery of beclomethasone dipropionate in the treatment of lung inflammation

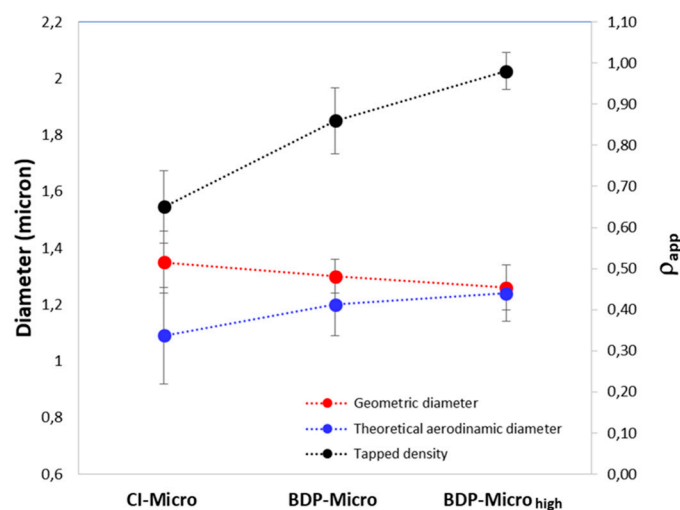

**Figure S1.** Values of tapped density ( $\delta_{tapp}$ ), mean geometric diameter ( $d_g$ ), theoretical aerodynamic diameter ( $d_{aer}$ ) of samples CI-Micro, BDP-Micro<sub>high</sub>, and BDP-Micro.

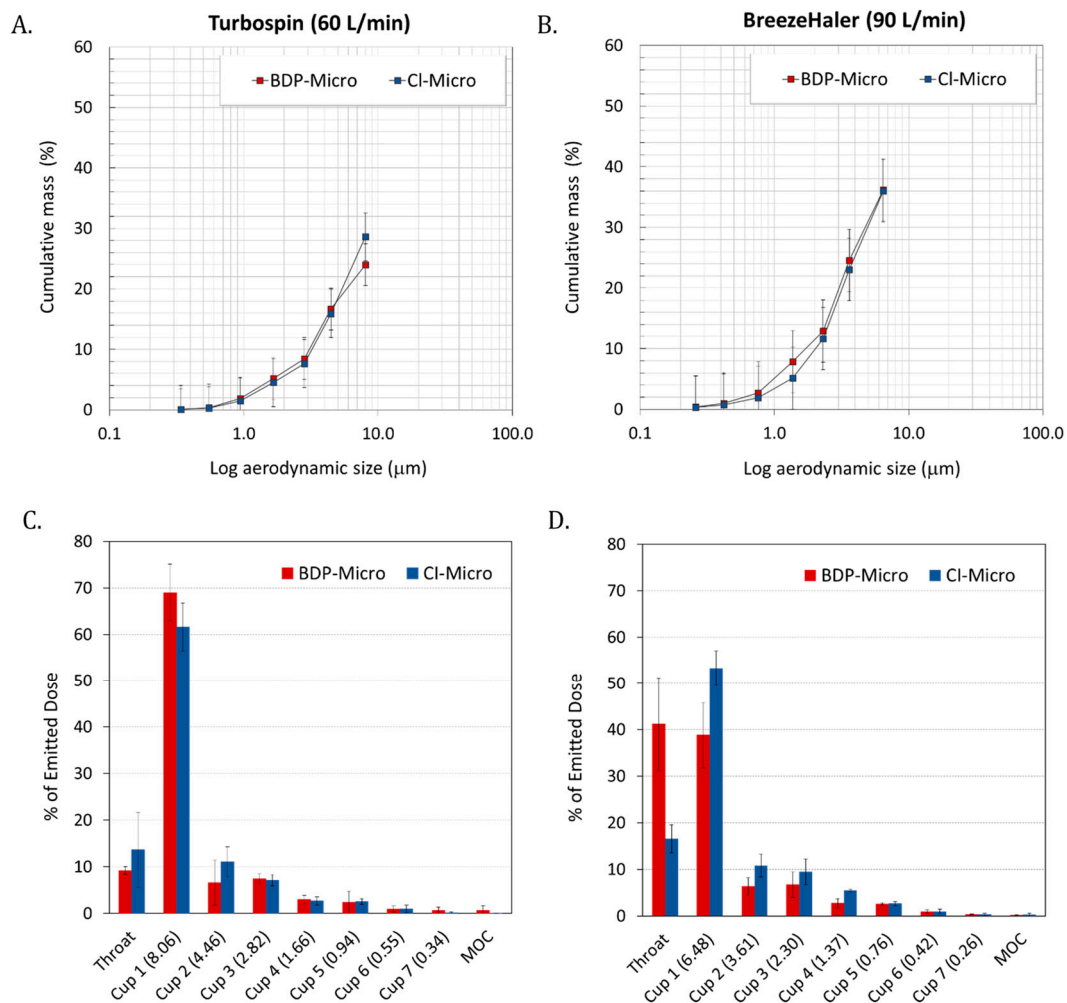

**Figure S2.** In vitro aerosol performance of BDP-Micro and CI-Micro upon delivery through Next Generation Impactor (NGI). The formulations were delivered the medium-resistance DPI Turbospin® (PH&T Pharma, Italy) and the low-resistance DPI Breezhaler® (RS01, Plastiapipe, Italy) at 60 and 90 L/min, respectively. (A,B) Cumulative mass recovered as a function of the cut-off diameter of the NGI; (C,D) NGI deposition pattern. Data are the mean  $\pm$  SD of values calculated on three different batches.
